# Supplementary material
Source: PubMed Central journal article supplement (PMC6511746)

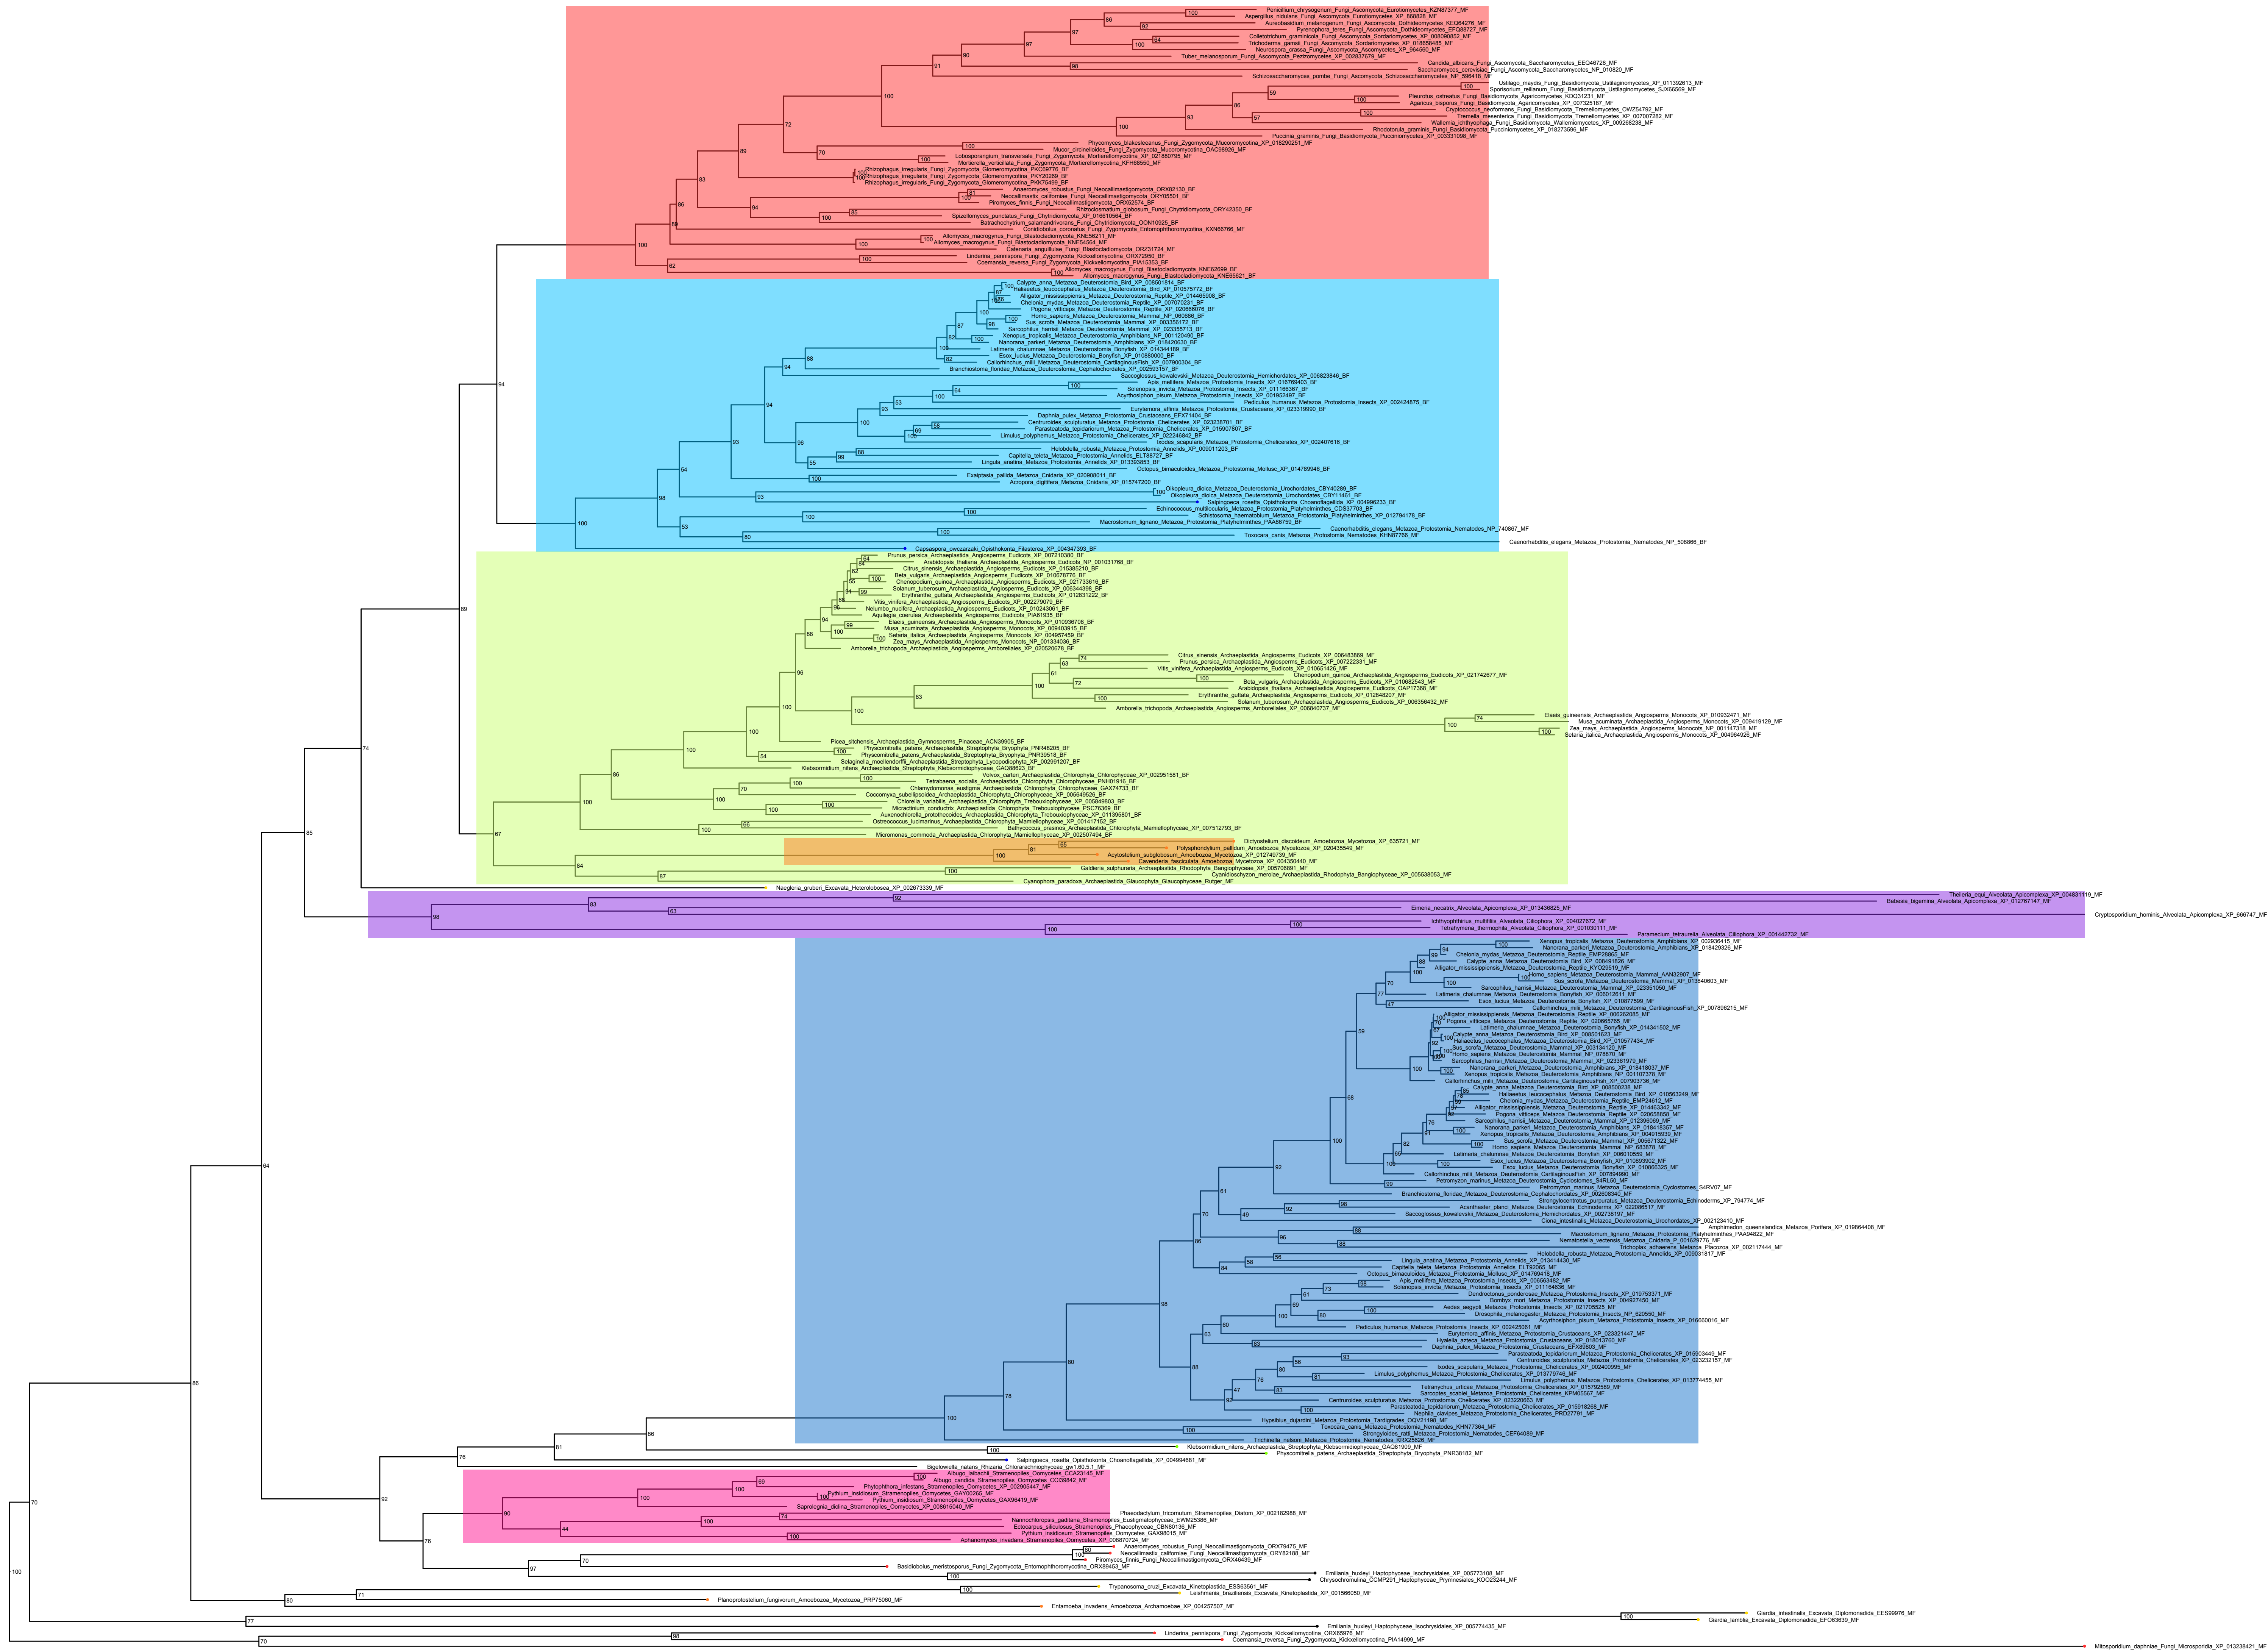

Supplement: PRO-28-1031-s001.pdf [file PRO-28-1031-s001.pdf]
